# Supplementary material
Source: PubMed Central journal article supplement (PMC2757291)
Supplement: NIHMS35067-supplement-01.pdf [file NIHMS35067-supplement-01.pdf]

## Supplemental Data

### The SLAM-Associated Protein Signaling Pathway

#### Is Required for Development of CD4<sup>+</sup> T Cells

#### Selected by Homotypic Thymocyte Interaction

Wei Li, M. Hanief Sofi, Svend Rietdijk, Ninghai Wang, Cox Terhorst, and Cheong-Hee Chang

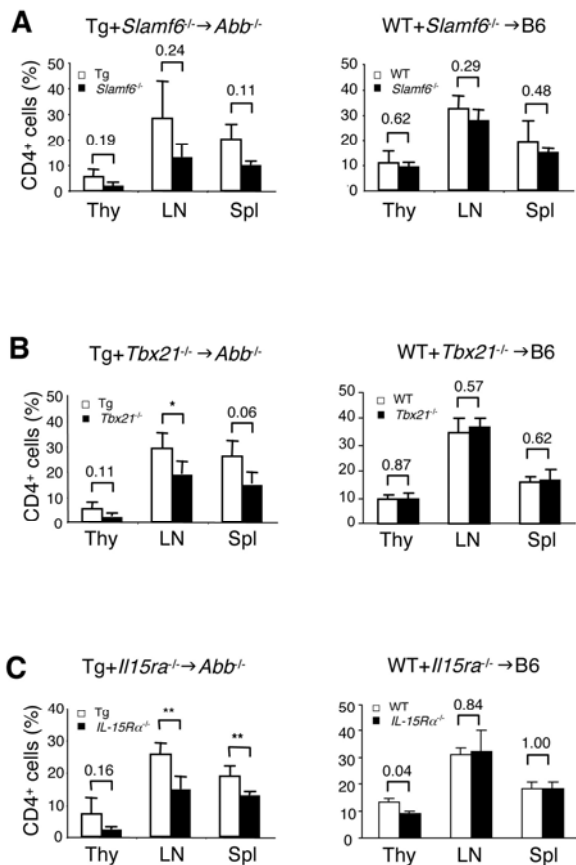

**Figure S1. T- and E-CD4 T cell generation in the absence of Ly108, T-bet or IL-15R $\alpha$**

(A) Percentage of CD4 SP

thymocytes and LN and splenic CD4

T cells from Tg+*Slamf6*<sup>-/-</sup>→*Abb*<sup>-/-</sup>

(left group) and of WT+*Slamf6*<sup>-/-</sup>

→B6 (right group) chimeric mice.

Data are shown as mean  $\pm$  SD from 3

mice for each group.

(B) Percentage of CD4 SP

thymocytes and LN and splenic CD4

T cells from Tg+*Tbx21*<sup>-/-</sup>→*Abb*<sup>-/-</sup> (left

group) and of WT+*Tbx21*<sup>-/-</sup>→B6

chimeric mice. Data are shown as

mean  $\pm$  SD from 3 mice for each group.

(C) Percentage of CD4 SP thymocytes and LN and splenic CD4 T cells from Tg+*Il15ra*<sup>-/-</sup>→*Abb*<sup>-/-</sup> (left group) and of WT+*Il15ra*<sup>-/-</sup>→B6 chimeric mice. Data are shown as mean  $\pm$  SD from 4 and 3 mice, respectively.

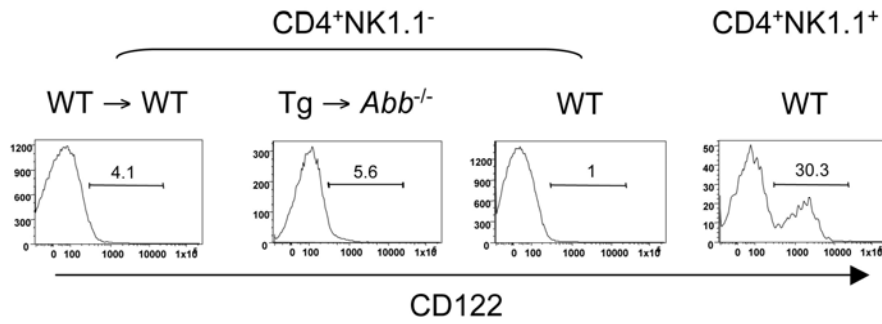

**Figure S2. T-CD4 T cells did not express a measurable level of CD122**

Shown in the histograms is the expression level of CD122 on gated splenic NK1.1<sup>-</sup> CD4 T cells (left three panels) and NK1.1<sup>+</sup> CD4 T cells (right panel). Approximately 5% of E-CD4 cells from WT→WT mice and T-CD4 T cells from Tg→*Abb*<sup>-/-</sup> mice are CD122 positive. In WT control mice, few NK1.1<sup>-</sup> CD4 T cells but a high percentage of NK1.1<sup>+</sup>CD4<sup>+</sup> T cells express CD122.

**A**

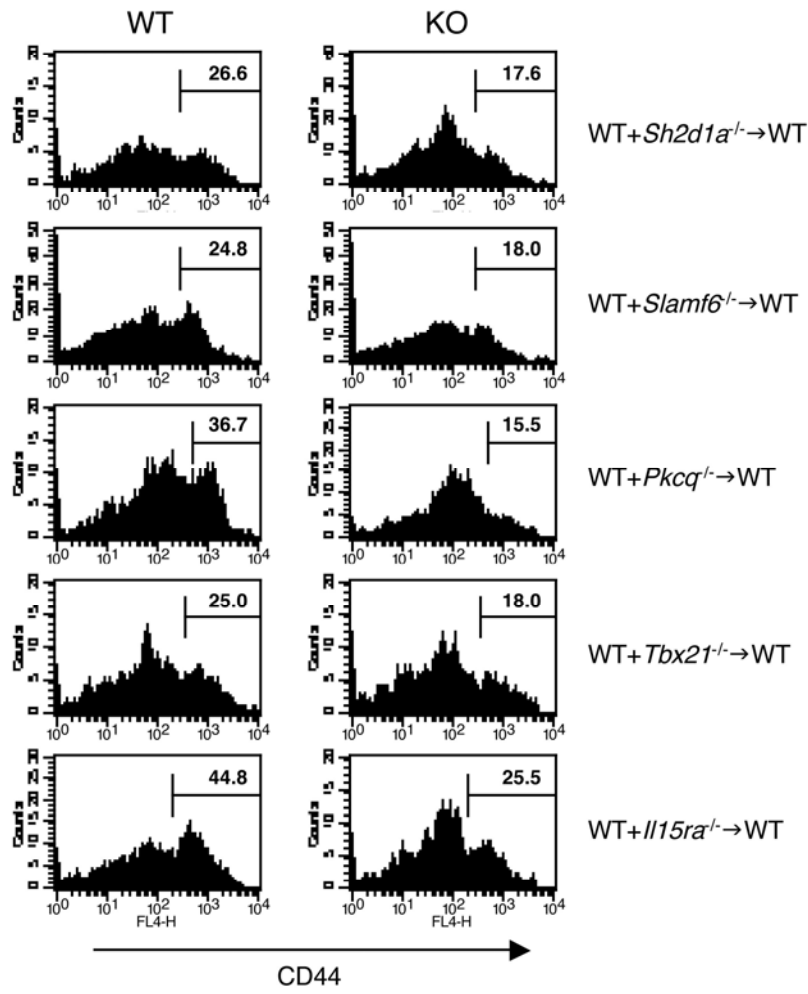

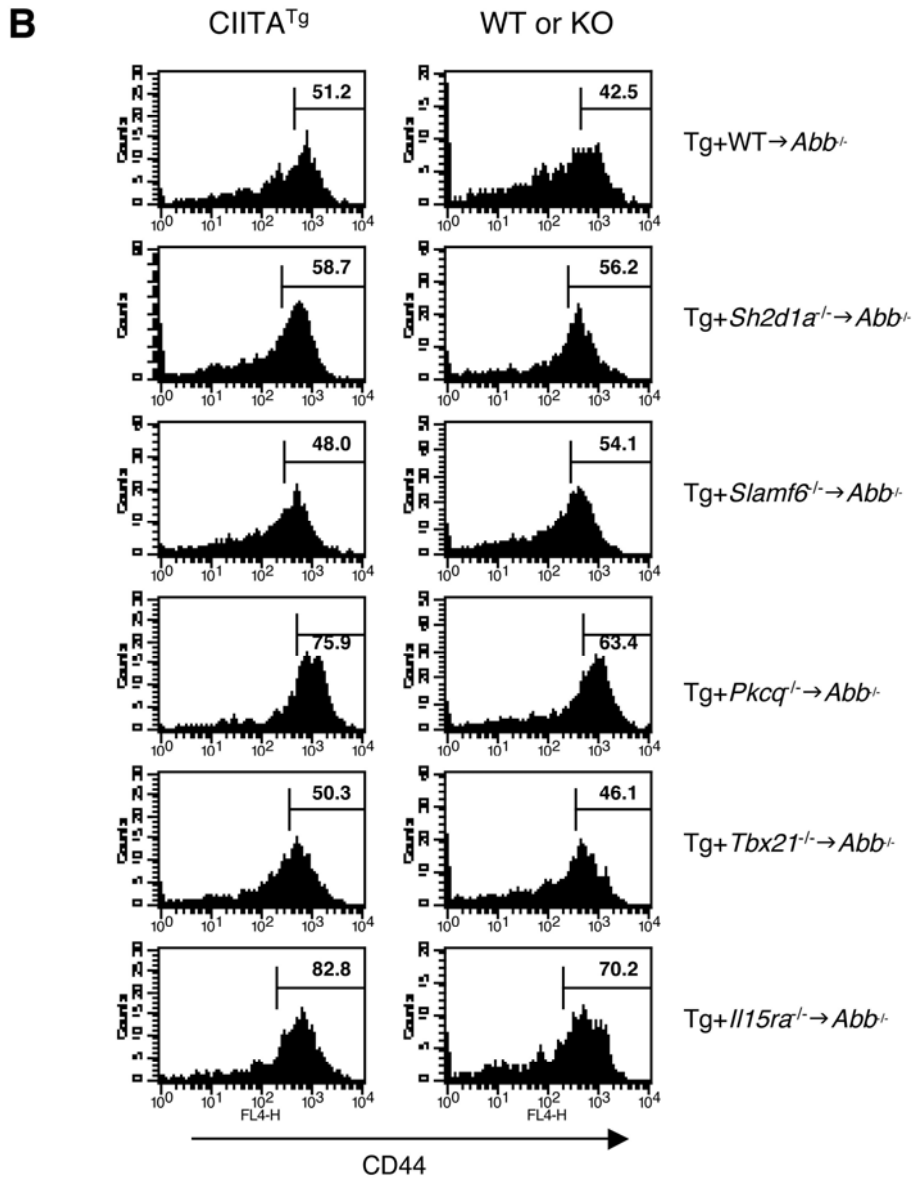

**Figure S3. Percentage of CD44<sup>hi</sup> splenic E-CD4 T cells (A) and T-CD4 T cells (B) in mixed BM chimeric mice**

The number in the histograms represents the percentage of CD44<sup>hi</sup> CD4 T cells.

Table S1. Total numbers of CD4 SP and CD4 cells in mixed BM chimeric mice

|                                                               | # of mice | Thy       |           | LN        |           | Sp        |           |
|---------------------------------------------------------------|-----------|-----------|-----------|-----------|-----------|-----------|-----------|
|                                                               |           | Tg        | WT or KO  | Tg        | WT or KO  | Tg        | WT or KO  |
| Tg + WT → <i>Abb</i> <sup>-/-</sup>                           | 5         | 0.41±0.15 | 0.93±0.37 | 1.45±0.99 | 1.15±0.81 | 2.22±0.94 | 2.26±1.17 |
| Tg + <i>Sh2d1a</i> <sup>-/-</sup> → <i>Abb</i> <sup>-/-</sup> | 4         | 0.44±0.46 | 0.16±0.14 | 0.91±0.38 | 0.20±0.12 | 1.69±0.32 | 0.28±0.12 |
| Tg + <i>Fyn</i> <sup>-/-</sup> → <i>Abb</i> <sup>-/-</sup>    | 2         | 0.27±0.03 | 0.25±0.05 | 0.30±0.23 | 0.10±0.04 | 3.66±2.82 | 0.88±0.38 |
| Tg + <i>Pkcq</i> <sup>-/-</sup> → <i>Abb</i> <sup>-/-</sup>   | 4         | 0.46±0.19 | 1.00±0.92 | 0.79±0.57 | 0.58±0.46 | 2.42±0.47 | 2.46±0.17 |
| Tg + <i>Slamf6</i> <sup>-/-</sup> → <i>Abb</i> <sup>-/-</sup> | 3         | 0.23±0.18 | 0.52±0.41 | 0.62±0.44 | 0.66±0.46 | 1.52±0.93 | 1.50±0.33 |
| Tg + <i>Tbx21</i> <sup>-/-</sup> → <i>Abb</i> <sup>-/-</sup>  | 3         | 0.13±0.07 | 0.38±0.23 | 0.52±0.14 | 0.73±0.19 | 1.81±0.91 | 1.55±0.17 |
| Tg + <i>Il15ra</i> <sup>-/-</sup> → <i>Abb</i> <sup>-/-</sup> | 4         | 0.28±0.18 | 0.56±0.45 | 0.72±0.45 | 0.69±0.56 | 1.65±1.21 | 1.52±1.27 |

The numbers ( $\times 10^6$ ) shown are mean±SD.

Table S2. Percentages of CD8 SP and CD8 cells in mixed BM chimeric mice

|                                                               | # of mice | Thy      |          | LN       |           | Sp      |          |
|---------------------------------------------------------------|-----------|----------|----------|----------|-----------|---------|----------|
|                                                               |           | Tg       | WT or KO | Tg       | WT or KO  | Tg      | WT or KO |
| Tg + WT → <i>Abb</i> <sup>-/-</sup>                           | 5         | 10.4±6.8 | 5.2±2.0  | 12.9±1.4 | 28.1±6.9  | 4.2±1.3 | 8.6±1.6  |
| Tg + <i>Sh2d1a</i> <sup>-/-</sup> → <i>Abb</i> <sup>-/-</sup> | 4         | 2.4±1.0  | 2.3±1.0  | 10.0±2.9 | 35.3±15.3 | 4.5±1.0 | 12.7±8.3 |
| Tg + <i>Fyn</i> <sup>-/-</sup> → <i>Abb</i> <sup>-/-</sup>    | 2         | 4.4±0.4  | 2.1±0.2  | 13.7±9.8 | 25.1±28.6 | 4.7±1.1 | 7.2±6.7  |
| Tg + <i>Pkcq</i> <sup>-/-</sup> → <i>Abb</i> <sup>-/-</sup>   | 4         | 2.7±1.3  | 6.0±3.8  | 13.2±8.0 | 20.5±10.0 | 5.7±2.6 | 9.7±2.6  |
| Tg + <i>Slamf6</i> <sup>-/-</sup> → <i>Abb</i> <sup>-/-</sup> | 3         | 8.8±6.8  | 5.8±4.2  | 10.0±1.9 | 25.5±4.9  | 5.6±2.1 | 5.3±3.1  |
| Tg + <i>Tbx21</i> <sup>-/-</sup> → <i>Abb</i> <sup>-/-</sup>  | 3         | 12.6±3.6 | 7.7±0.5  | 13.0±4.0 | 31.0±7.2  | 5.7±0.6 | 23.7±5.5 |
| Tg + <i>Il15ra</i> <sup>-/-</sup> → <i>Abb</i> <sup>-/-</sup> | 4         | 4.2±1.5  | 3.3±4.7  | 11.5±4.4 | 27.0±10.9 | 5.5±1.3 | 14.5±7.0 |

The percentage was calculated on total thymocytes, LN, or hemolyzed splenic cells of each genotype.

Table S3. Total numbers of CD8 SP and CD8 cells in mixed BM chimeric mice

|                                                               | # of mice | Thy       |           | LN        |           | Sp        |           |
|---------------------------------------------------------------|-----------|-----------|-----------|-----------|-----------|-----------|-----------|
|                                                               |           | Tg        | WT or KO  | Tg        | WT or KO  | Tg        | WT or KO  |
| Tg + WT → <i>Abb</i> <sup>-/-</sup>                           | 5         | 0.62±0.53 | 1.05±0.78 | 0.64±0.44 | 1.65±1.11 | 0.47±0.18 | 1.26±0.26 |
| Tg + <i>Sh2d1a</i> <sup>-/-</sup> → <i>Abb</i> <sup>-/-</sup> | 4         | 0.23±0.27 | 0.87±0.67 | 0.27±0.09 | 1.73±0.88 | 0.34±0.11 | 1.58±0.73 |
| Tg + <i>Fyn</i> <sup>-/-</sup> → <i>Abb</i> <sup>-/-</sup>    | 2         | 0.20±0.04 | 0.64±0.15 | 0.09±0.03 | 0.18±0.15 | 0.80±0.52 | 1.13±0.77 |
| Tg + <i>Pkcq</i> <sup>-/-</sup> → <i>Abb</i> <sup>-/-</sup>   | 4         | 0.22±0.15 | 2.92±1.61 | 0.39±0.33 | 1.38±0.88 | 0.52±0.23 | 2.55±1.09 |
| Tg + <i>Slamf6</i> <sup>-/-</sup> → <i>Abb</i> <sup>-/-</sup> | 3         | 0.39±0.33 | 1.52±1.28 | 0.22±0.14 | 1.24±0.86 | 0.37±0.08 | 1.64±0.40 |
| Tg + <i>Tbx21</i> <sup>-/-</sup> → <i>Abb</i> <sup>-/-</sup>  | 3         | 0.29±0.10 | 1.28±0.41 | 0.23±0.09 | 1.18±0.36 | 0.37±0.07 | 2.61±0.81 |
| Tg + <i>Il15ra</i> <sup>-/-</sup> → <i>Abb</i> <sup>-/-</sup> | 4         | 0.18±0.13 | 0.79±0.70 | 0.31±0.19 | 1.20±0.83 | 0.42±0.29 | 1.65±0.76 |

The numbers ( $\times 10^6$ ) shown are mean±SD.
